# Supplementary material for: Prevalence of Macroprolactin in Hyperprolactinemic patients receiving Anti-psychotics
Source: bioRxiv or medRxiv preprint supplement (doi:10.1101/2021.05.11.21256928), 2021-05-11

# Sultanate of Oman

MINISTRY OF HEALTH

Directorate General of Health Services

GOVERNORATE OF MUSCAT

Director General Office

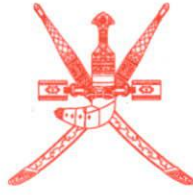

سلطنة عُمان  
وزارة الصحة

المديرية العامة للخدمات الصحية  
محافظة مسقط

مكتب المدير العام

Ref: MH/DGHS/DPT/563/2020

12 April, 2020

To Dr. Loai Ali

Re/Research and Ethics Committee Feedback

After Compliments,

Reference to your letter regarding your research "Prevalence of macroprolactine in patients receiving anti-psychotics " we are delighted to inform you that the study is approved by the regional research and ethics Committee. Kindly make sure that your data collection won't interfere with the flow of service and remember to send us a copy of the final results.

Your cooperation is highly appreciated

With kind regards

  
Dr. Fatma Al Ajmi  
Chairperson of Regional Research Committee  
Director General of Health Services-Muscat

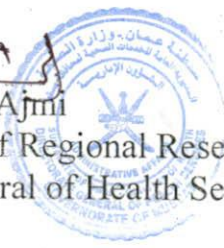

Supplement: Supplementary file [file media-1.pdf]
